# Supplementary material
Source: PubMed Central journal article supplement (PMC2668018)
Supplement: mmc1.pdf [file mmc1.pdf]

## Supplemental Data

### Mutations in *CNNM4* Cause Recessive Cone-Rod

### Dystrophy with Amelogenesis Imperfecta

Bozena Polok, Pascal Escher, Aude Ambresin, Eliane Chouery, Sylvain Bolay, Isabelle Meunier, Francis Nan, Christian Hamel, Francis L. Munier, Bernard Thilo, André Mégarbané, and Daniel F. Schorderet

#### This file contains:

- Figure S1
- Figure S2
- Figure S3
- Table S1
- Table S2
- Table S3

**Figure S1**

**Mapping of homozygous regions.** The homozygous regions (black boxes) are schematically represented on human chromosomes.

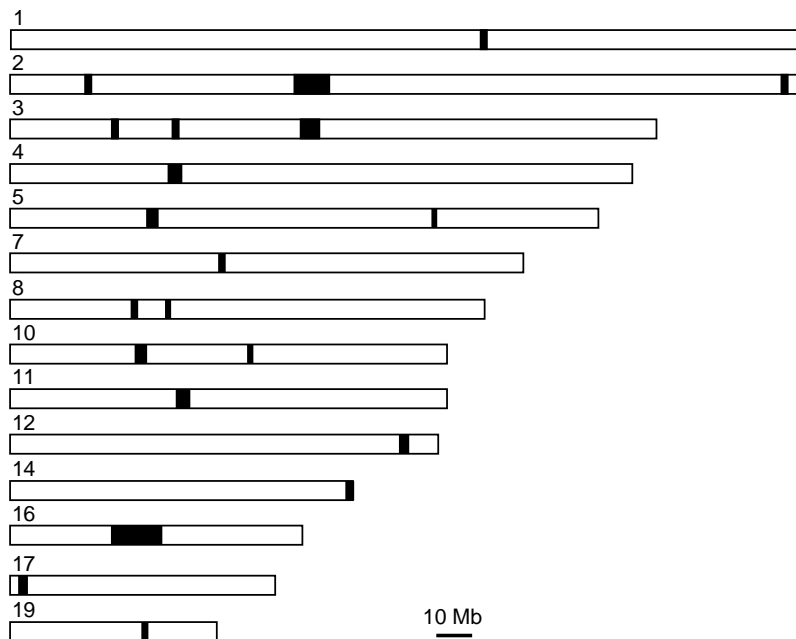

Homozygous regions larger than 3 Mb observed in the genomes of the affected members of family A, as detected by Affymetrix human mapping 50K XbaI array.

**Region 1: chromosome 2**

| Affymetrix 50k XbaI analysis |     |                   |             |            |               |                   |                   |               |                   |            |
|------------------------------|-----|-------------------|-------------|------------|---------------|-------------------|-------------------|---------------|-------------------|------------|
| SNP ID                       | Chr | Physical position | dbSNP RS ID | Father I.1 | Affected II.1 | Non affected II.2 | Non affected II.3 | Affected II.4 | non affected II.5 | Mother I.2 |
| SNP_A-1719769                | 2   | 86,891,380        | rs2138396   | BB         | AB            | BB                | AB                | AB            | BB                | AB         |
| SNP_A-1712039                | 2   | 88,220,998        | rs2970925   | AB         | BB            | AB                | AB                | BB            | AA                | AB         |
| SNP_A-1722054                | 2   | 88,229,494        | rs2919852   | AB         | BB            | AB                | AB                | BB            | AA                | AB         |
| SNP_A-1716635                | 2   | 88,241,242        | rs2363009   | AA         | AA            | AA                | AA                | AA            | AA                | AA         |
| SNP_A-1694131                | 2   | 88,241,599        | rs894198    | BB         | BB            | BB                | BB                | BB            | BB                | BB         |
| SNP_A-1694819                | 2   | 88,241,773        | rs1866946   | AA         | AA            | AA                | AA                | AA            | AA                | AA         |
| SNP_A-1756685                | 2   | 88,241,822        | rs894197    | AA         | AA            | AA                | AA                | AA            | AA                | AA         |
| SNP_A-1736727                | 2   | 88,254,480        | rs1530272   | AA         | AA            | AA                | AA                | AA            | AA                | AA         |
| SNP_A-1745109                | 2   | 88,274,497        | rs7581571   | AA         | AA            | AB                | AB                | AA            | AB                | AB         |
| SNP_A-1717099                | 2   | 88,307,196        | rs4490185   | BB         | BB            | AB                | AB                | BB            | AB                | AB         |
| SNP_A-1734218                | 2   | 88,359,373        | rs9309645   | AA         | AA            | AA                | AA                | AA            | AA                | AA         |
| SNP_A-1666848                | 2   | 88,361,055        | rs2363731   | AA         | AA            | AA                | AA                | AA            | AA                | AA         |
| SNP_A-1642213                | 2   | 88,444,147        | rs1258439   | AA         | AA            | AA                | AA                | AA            | AA                | AA         |
| SNP_A-1656673                | 2   | 88,993,415        | rs1074883   | AA         | AA            | AA                | AA                | AA            | AA                | AA         |
| SNP_A-1727591                | 2   | 95,606,297        | rs1862896   | AB         | AA            | AA                | AA                | AA            | AB                | AA         |
| SNP_A-1711122                | 2   | 97,105,203        | rs10496325  | BB         | BB            | BB                | BB                | BB            | BB                | BB         |
| SNP_A-1703353                | 2   | 97,105,313        | rs1256995   | BB         | BB            | BB                | BB                | BB            | BB                | BB         |
| SNP_A-1654251                | 2   | 97,870,800        | rs1562293   | AA         | AA            | AA                | AA                | AA            | AA                | AA         |
| SNP_A-1681064                | 2   | 97,871,581        | rs2293679   | AA         | AA            | AA                | AA                | AA            | AA                | AA         |
| SNP_A-1756825                | 2   | 97,878,052        | rs718159    | AA         | AA            | AA                | AA                | AA            | AA                | NoCall     |
| SNP_A-1656407                | 2   | 97,958,330        | rs10520549  | AA         | AA            | AA                | AA                | AA            | AA                | AA         |
| SNP_A-1726522                | 2   | 97,958,735        | rs1026015   | AA         | AA            | AA                | AA                | AA            | AA                | AA         |
| SNP_A-1698895                | 2   | 98,065,288        | rs953320    | AA         | AA            | AA                | AA                | AA            | AA                | AA         |
| SNP_A-1728457                | 2   | 98,135,770        | rs298900    | AB         | AB            | AB                | AB                | AB            | AB                | AB         |

Region 2: chromosome 16

| SNP ID        | Chr | Physical position | dbSNP RS ID | Father I.1 | Affected II.1 | Non affected II.2 | Non affected II.3 | Affected II.4 | non affected II.5 | Mother I.2 |
|---------------|-----|-------------------|-------------|------------|---------------|-------------------|-------------------|---------------|-------------------|------------|
| SNP_A-1647134 | 16  | 31,637,053        | rs2141349   | AA         | AB            | AA                | AA                | AB            | AB                | AB         |
| SNP_A-1705117 | 16  | 31,687,619        | rs10492807  | AA         | AA            | AA                | AA                | AA            | AA                | AA         |
| SNP_A-1704587 | 16  | 34,493,676        | rs2404821   | AB         | AA            | AA                | AB                | AA            | AA                | AA         |
| SNP_A-1745037 | 16  | 45,293,764        | rs370159    | AB         | BB            | BB                | AB                | BB            | BB                | BB         |
| SNP_A-1743163 | 16  | 45,704,219        | rs10518838  | AB         | AA            | AA                | AB                | AA            | AA                | AA         |
| SNP_A-1669317 | 16  | 45,716,367        | rs9328707   | BB         | BB            | BB                | BB                | BB            | BB                | BB         |
| SNP_A-1728975 | 16  | 46,068,824        | rs9328592   | AA         | AA            | AA                | AA                | AA            | AA                | AA         |
| SNP_A-1679126 | 16  | 46,222,649        | rs10521162  | AA         | AA            | AA                | AA                | AA            | AA                | AA         |
| SNP_A-1655423 | 16  | 46,288,947        | rs10521163  | BB         | BB            | BB                | BB                | BB            | BB                | BB         |
| SNP_A-1696880 | 16  | 46,306,307        | rs9328600   | AA         | AA            | AA                | AA                | AA            | AA                | AA         |
| SNP_A-1733078 | 16  | 46,716,800        | rs1345425   | AA         | AA            | AA                | AA                | AA            | AA                | AA         |
| SNP_A-1710265 | 16  | 46,723,079        | rs939362    | AA         | AA            | AA                | AA                | AA            | AA                | AA         |
| SNP_A-1669247 | 16  | 46,754,604        | rs8050306   | AA         | AB            | AA                | AA                | AB            | AB                | AB         |

Region 3: chromosome 3

| SNP ID        | Chr | Physical position | dbSNP RS ID | Father I.1 | Affected II.1 | Non affected II.2 | Non affected II.3 | Affected II.4 | non affected II.5 | Mother I.2 |
|---------------|-----|-------------------|-------------|------------|---------------|-------------------|-------------------|---------------|-------------------|------------|
| SNP_A-1758263 | 3   | 89,193,457        | rs10511144  | BB         | AB            | BB                | AB                | AB            | AB                | AB         |
| SNP_A-1746981 | 3   | 89,708,135        | rs763900    | AA         | AA            | AA                | AA                | AA            | AA                | AA         |
| SNP_A-1726472 | 3   | 90,045,737        | rs1915734   | AA         | AA            | AA                | AA                | AA            | AA                | AA         |
| SNP_A-1684696 | 3   | 95,122,010        | rs4133534   | AA         | AA            | AB                | AA                | AA            | AA                | AB         |
| SNP_A-1726912 | 3   | 95,569,562        | rs2087734   | AA         | AA            | AB                | AA                | AA            | AA                | AB         |
| SNP_A-1655477 | 3   | 95,595,165        | rs1388639   | BB         | BB            | AB                | BB                | BB            | BB                | AB         |
| SNP_A-1657287 | 3   | 9559591           | rs7622335   | AA         | AB            | AA                | AB                | AB            | AB                | AB         |

Region 4: chromosome 4

| SNP ID        | Chr | Physical position | dbSNP RS ID | Father I.1 | Affected II.1 | Non affected II.2 | Non affected II.3 | Affected II.4 | non affected II.5 | Mother I.2 |
|---------------|-----|-------------------|-------------|------------|---------------|-------------------|-------------------|---------------|-------------------|------------|
| SNP_A-1714577 | 4   | 48,758,929        | rs10517230  | AB         | BB            | BB                | BB                | AB            | BB                | BB         |
| SNP_A-1669019 | 4   | 48,759,323        | rs10517231  | AA         | AA            | AA                | AB                | AA            | AB                | AB         |
| SNP_A-1758758 | 4   | 52,525,819        | rs2319743   | BB         | BB            | BB                | BB                | BB            | BB                | BB         |
| SNP_A-1686342 | 4   | 52,555,439        | rs6851073   | AA         | AA            | AA                | AA                | AA            | AA                | AA         |
| SNP_A-1734028 | 4   | 52,625,606        | rs6852236   | BB         | BB            | BB                | BB                | BB            | BB                | BB         |
| SNP_A-1660315 | 4   | 52,737,579        | rs178724    | AA         | AA            | AA                | AA                | AA            | AA                | AA         |
| SNP_A-1729816 | 4   | 52,737,718        | rs225172    | AA         | AA            | AA                | AA                | AA            | AA                | AA         |
| SNP_A-1725508 | 4   | 52,870,613        | rs10517245  | BB         | BB            | BB                | BB                | BB            | BB                | BB         |
| SNP_A-1740259 | 4   | 52881109          | rs713222    | AB         | BB            | BB                | BB                | AB            | BB                | BB         |

Region 5: chromosome 11

| SNP ID        | Chr | Physical position | dbSNP RS ID | Father I.1 | Affected II.1 | Non affected II.2 | Non affected II.3 | Affected II.4 | non affected II.5 | Mother I.2 |
|---------------|-----|-------------------|-------------|------------|---------------|-------------------|-------------------|---------------|-------------------|------------|
| SNP_A-1722254 | 11  | 51,319,510        | rs521874    | AB         | AB            | AB                | AB                | AB            | AB                | AB         |
| SNP_A-1730120 | 11  | 51,333,408        | rs1694610   | AA         | AA            | AA                | AA                | AA            | AA                | AA         |
| SNP_A-1735639 | 11  | 51,383,331        | rs2078611   | BB         | BB            | BB                | BB                | BB            | BB                | BB         |
| SNP_A-1738999 | 11  | 51,383,437        | rs3886724   | BB         | BB            | BB                | BB                | BB            | BB                | BB         |
| SNP_A-1729270 | 11  | 54,916,541        | rs4316524   | AA         | AA            | AA                | AA                | AA            | AA                | AA         |
| SNP_A-1758699 | 11  | 54,945,728        | rs1237929   | AB         | BB            | AB                | AA                | BB            | AB                | AB         |
| SNP_A-1700728 | 11  | 55,187,106        | rs295603    | BB         | BB            | BB                | BB                | BB            | BB                | BB         |
| SNP_A-1688446 | 11  | 55,248,049        | rs10501337  | AA         | AA            | AA                | AA                | AA            | AA                | AA         |
| SNP_A-1663756 | 11  | 55,439,371        | rs10501340  | AA         | AA            | AA                | AA                | AA            | AA                | AA         |
| SNP_A-1646156 | 11  | 55,466,760        | rs10501342  | BB         | BB            | BB                | BB                | BB            | BB                | BB         |
| SNP_A-1677524 | 11  | 55,467,285        | rs7939844   | AB         | AB            | BB                | BB                | AB            | BB                | BB         |

Region 6: chromosome 5

| SNP ID        | Chr | Physical position | dbSNP RS ID | Father I.1 | Affected II.1 | Non affected II.2 | Non affected II.3 | Affected II.4 | non affected II.5 | Mother I.2 |
|---------------|-----|-------------------|-------------|------------|---------------|-------------------|-------------------|---------------|-------------------|------------|
| SNP_A-1642403 | 5   | 42,405,670        | rs950812    | AB         | NoCall        | BB                | BB                | AB            | BB                | BB         |
| SNP_A-1656759 | 5   | 42,431,038        | rs1858138   | AB         | AA            | AB                | BB                | AA            | BB                | AB         |
| SNP_A-1667432 | 5   | 42,431,058        | rs1858137   | BB         | BB            | BB                | BB                | BB            | BB                | BB         |
| SNP_A-1720391 | 5   | 42,443,617        | rs1509461   | AB         | BB            | AB                | AA                | BB            | AA                | AB         |
| SNP_A-1751275 | 5   | 42,761,386        | rs719756    | AB         | AA            | AB                | AB                | AA            | AB                | AA         |
| SNP_A-1647578 | 5   | 42,783,879        | rs722678    | AA         | AA            | AA                | AA                | AA            | AA                | AA         |
| SNP_A-1725364 | 5   | 42,816,054        | rs1364026   | AA         | AA            | AA                | AA                | AA            | AA                | AA         |
| SNP_A-1717547 | 5   | 42,835,028        | rs230814    | AB         | AA            | AB                | AB                | AA            | AB                | AA         |
| SNP_A-1677326 | 5   | 42,836,481        | rs6413428   | AB         | BB            | AB                | AB                | BB            | AB                | BB         |
| SNP_A-1728275 | 5   | 42,843,181        | rs230820    | AB         | AA            | AB                | AB                | AA            | AB                | AA         |
| SNP_A-1687096 | 5   | 42,874,313        | rs10512806  | BB         | BB            | BB                | BB                | BB            | BB                | BB         |
| SNP_A-1659378 | 5   | 43,047,397        | rs2329995   | AB         | AA            | AB                | BB                | AA            | BB                | AB         |
| SNP_A-1675097 | 5   | 43,063,978        | rs9292862   | AB         | BB            | AB                | AA                | BB            | AA                | AB         |
| SNP_A-1666636 | 5   | 43,248,347        | rs10512821  | AB         | AA            | AB                | BB                | AA            | BB                | AB         |
| SNP_A-1672582 | 5   | 43,248,972        | rs230090    | AB         | AA            | AB                | BB                | AA            | BB                | AB         |
| SNP_A-1681086 | 5   | 43,403,823        | rs10512827  | AB         | BB            | AB                | AB                | BB            | AB                | BB         |
| SNP_A-1749125 | 5   | 43,404,047        | rs10512828  | AB         | AA            | AB                | AB                | AA            | AB                | AA         |
| SNP_A-1745444 | 5   | 43,419,155        | rs779850    | AB         | AA            | AB                | AB                | AA            | AB                | AA         |
| SNP_A-1683874 | 5   | 43,731,198        | rs16873496  | BB         | BB            | BB                | BB                | BB            | BB                | BB         |
| SNP_A-1752721 | 5   | 44,264,182        | rs10512836  | AA         | AA            | AA                | AA                | AA            | AA                | AA         |
| SNP_A-1669433 | 5   | 44,269,535        | rs726941    | BB         | BB            | BB                | AB                | BB            | AB                | AB         |
| SNP_A-1749265 | 5   | 44,329,760        | rs1374977   | BB         | BB            | BB                | AB                | BB            | AB                | AB         |
| SNP_A-1652106 | 5   | 44,335,755        | rs9292903   | BB         | BB            | BB                | AB                | BB            | AB                | AB         |
| SNP_A-1724370 | 5   | 44,377,093        | rs10512845  | AA         | AA            | AA                | AB                | AA            | AB                | AB         |
| SNP_A-1735280 | 5   | 44,377,640        | rs1037181   | BB         | BB            | BB                | BB                | BB            | BB                | BB         |
| SNP_A-1669085 | 5   | 44,419,757        | rs10512848  | AA         | AA            | AA                | AA                | AA            | AA                | AA         |
| SNP_A-1749017 | 5   | 44,419,980        | rs10512849  | AA         | AA            | AA                | AA                | AA            | AA                | AA         |
| SNP_A-1687196 | 5   | 44,421,083        | rs10512851  | BB         | BB            | BB                | BB                | BB            | BB                | BB         |
| SNP_A-1699509 | 5   | 44,423,294        | rs2973646   | BB         | BB            | BB                | AB                | BB            | AB                | AB         |
| SNP_A-1726740 | 5   | 44,429,326        | rs10512852  | BB         | BB            | BB                | BB                | BB            | BB                | BB         |
| SNP_A-1682656 | 5   | 44,514,499        | rs1482684   | AA         | AA            | AA                | AB                | AA            | AB                | AB         |
| SNP_A-1689683 | 5   | 44,516,774        | rs10512853  | BB         | BB            | BB                | BB                | BB            | BB                | BB         |
| SNP_A-1758245 | 5   | 45,285,361        | rs10512876  | AA         | AA            | AA                | AA                | AA            | AA                | AA         |
| SNP_A-1712103 | 5   | 45,286,487        | rs10512875  | BB         | BB            | BB                | BB                | BB            | BB                | BB         |
| SNP_A-1735883 | 5   | 45,589,144        | rs1384732   | AA         | NoCall        | NoCall            | NoCall            | NoCall        | NoCall            | NoCall     |
| SNP_A-1747517 | 5   | 45,775,824        | rs10512877  | BB         | BB            | BB                | BB                | BB            | BB                | BB         |
| SNP_A-1725158 | 5   | 45,776,880        | rs2337953   | AA         | AA            | AA                | AA                | AA            | AA                | AA         |
| SNP_A-1730659 | 5   | 49,596,616        | rs1328254   | AA         | AB            | AB                | AB                | AB            | AB                | BB         |

Region 7: chromosome 10

| SNP ID        | Chr | Physical position | dbSNP RS ID | Father I.1 | Affected II.1 | Non affected II.2 | Non affected II.3 | Affected II.4 | non affected II.5 | Mother I.2 |
|---------------|-----|-------------------|-------------|------------|---------------|-------------------|-------------------|---------------|-------------------|------------|
| SNP_A-1643876 | 10  | 38,578,777        | rs1740752   | AB         | AB            | AB                | AB                | AB            | AA                | AA         |
| SNP_A-1693319 | 10  | 38,584,925        | rs10508864  | BB         | BB            | BB                | BB                | BB            | BB                | BB         |
| SNP_A-1647840 | 10  | 42,276,475        | rs10508867  | BB         | BB            | BB                | BB                | BB            | BB                | BB         |
| SNP_A-1695273 | 10  | 42,332,699        | rs210236    | AB         | AB            | AB                | AB                | AB            | AA                | AA         |

Region 8: chromosome 2

| SNP ID        | Chr | Physical position | dbSNP RS ID | Father I.1 | Affected II.1 | Non affected II.2 | Non affected II.3 | Affected II.4 | non affected II.5 | Mother I.2 |
|---------------|-----|-------------------|-------------|------------|---------------|-------------------|-------------------|---------------|-------------------|------------|
| SNP_A-1665344 | 2   | 237,924,688       | rs4129307   | AA         | AB            | AA                | AB                | AB            | AA                | AB         |
| SNP_A-1668757 | 2   | 238,068,613       | rs1826873   | AB         | AA            | AA                | AB                | AA            | AB                | AA         |
| SNP_A-1642069 | 2   | 238,390,821       | rs3754728   | BB         | BB            | BB                | BB                | BB            | BB                | BB         |
| SNP_A-1718535 | 2   | 238,421,192       | rs903371    | AA         | AA            | AA                | AA                | AA            | AA                | AA         |
| SNP_A-1647472 | 2   | 238,659,740       | rs1446924   | AA         | AA            | AA                | AA                | AA            | AA                | AA         |
| SNP_A-1758503 | 2   | 238,779,956       | rs1374386   | AA         | AA            | AB                | AA                | AA            | AB                | AB         |
| SNP_A-1681506 | 2   | 238,798,933       | rs878133    | BB         | BB            | BB                | BB                | BB            | BB                | BB         |
| SNP_A-1682860 | 2   | 240,067,248       | rs843451    | AA         | AA            | AA                | AA                | AA            | AA                | AA         |
| SNP_A-1746364 | 2   | 240,068,225       | rs709274    | BB         | BB            | BB                | BB                | BB            | BB                | BB         |
| SNP_A-1677650 | 2   | 240,504,012       | rs2412029   | AB         | AA            | AA                | AB                | AA            | AB                | AA         |
| SNP_A-1754047 | 2   | 241,058,775       | rs2352852   | AA         | AA            | AA                | AA                | AA            | AA                | AA         |
| SNP_A-1648538 | 2   | 241,524,068       | rs4129624   | AA         | AA            | AA                | AA                | AA            | AA                | AA         |
| SNP_A-1677230 | 2   | 241,601,632       | rs4130554   | AB         | AB            | BB                | AA                | AB            | AB                | AB         |

Figure S2

**Cross-species alignment of mutation-harboring *CNNM4* regions (A,C) and paralog comparison (B,D) of human (h) and mouse (m) *CNNM* genes.** Black boxes above sequence comparisons represent the beginning of the second transmembrane (TM) domain (A), respectively the end of the fourth TM domain (C). \* denotes amino acid identity.

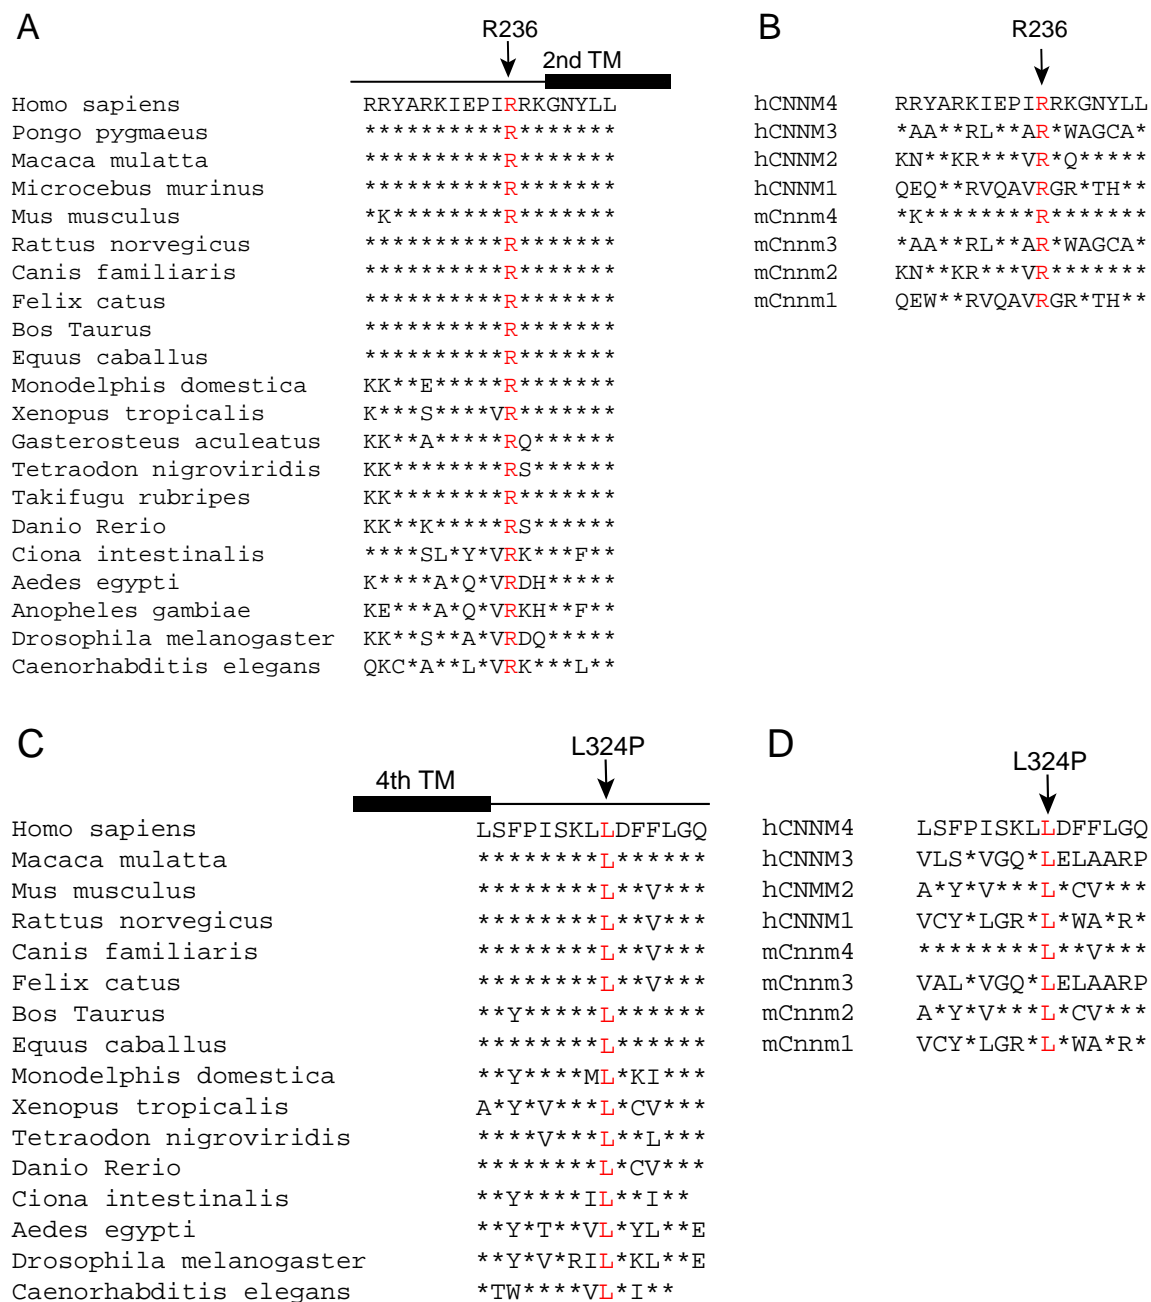

Figure S3

**Cnnm4 mRNA expression is at its highest levels in the mouse retina.** Mouse Cnnm1, -2, -3 and -4 mRNA expression was assessed by RT-PCR (Panel A) and quantitative PCR (Panel B) in mouse brain, retina, cornea, lens and RPE with attached choroid (RPE) samples. Pooled total RNA samples of 2 mice were used for each experiment. For RT-PCR, amplified PCR fragments were analyzed on a 2% agarose gel and fragments of the expected size were detected, respectively 440 bp for Cnnm1, 333 bp for Cnnm2, 195 bp for Cnnm3, 280 bp for Cnnm4 and 198 bp for the control gene RL8 (ribosomal protein L8), as indicated by the 1kb Molecular Weight Marker (M; Roche, Basel, Switzerland). Quantitative PCR was performed on three samples in duplicate (+/-SEM) and all Cnnm mRNA expression levels were normalized to RL8 expression. Cnnm4 expression was also analysed in mandibula, upper and lower incisives by RT-PCR (Panel C) and quantitative PCR (Panel D).

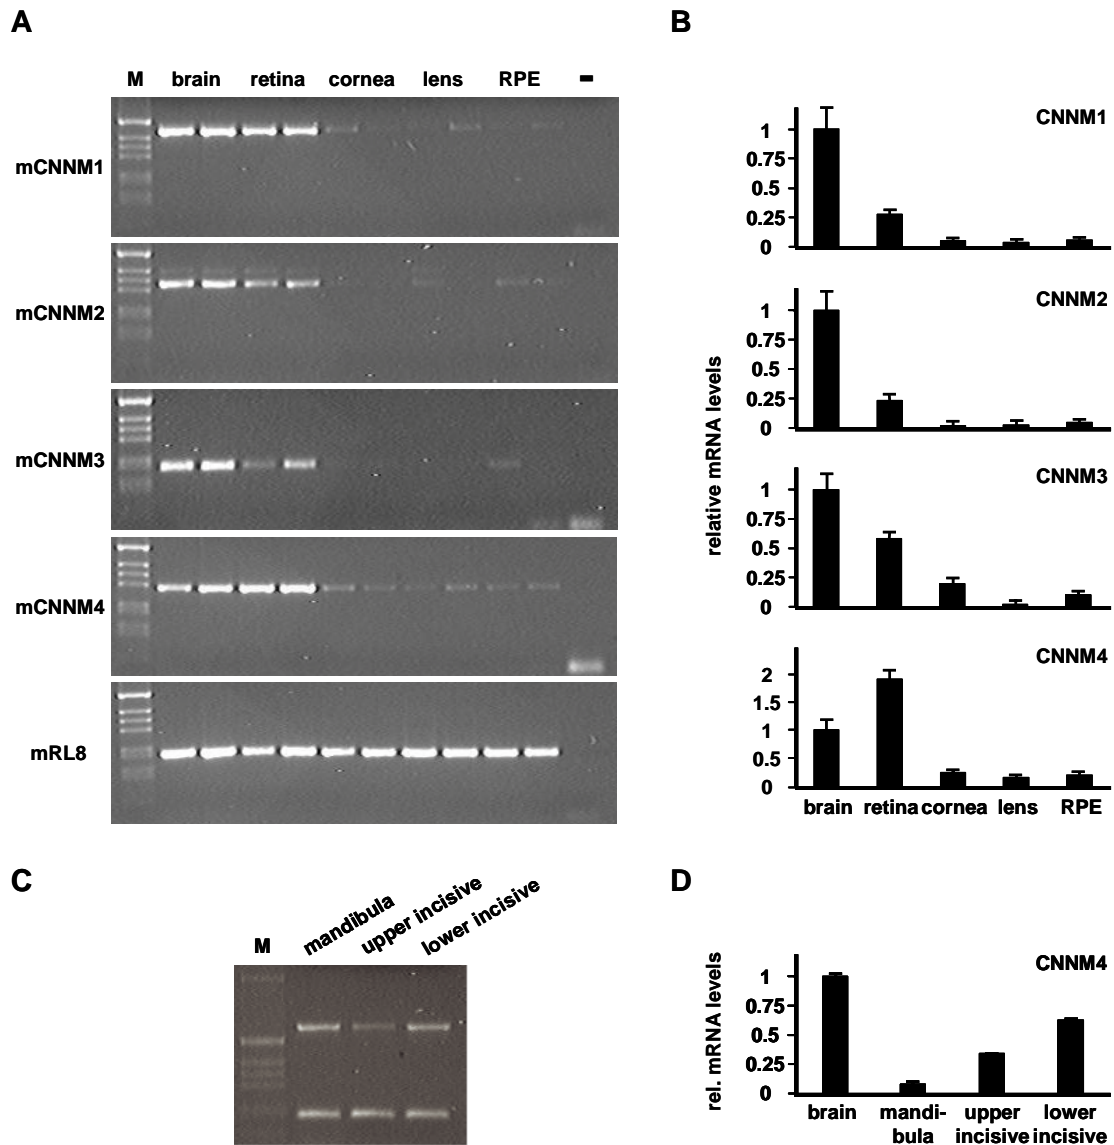

**Table S1**

List of sequenced genes in the homozygous region of chromosome 2

| <b>Gene ID</b> | <b>Physical position<br/>on Chr 2 (start)</b> | <b>Number of<br/>exons</b> | <b>OMIM</b> |
|----------------|-----------------------------------------------|----------------------------|-------------|
| <i>TEKT4</i>   | 94'900'959                                    | 6                          |             |
| <i>MAL</i>     | 95'055'156                                    | 4                          | 188860      |
| <i>PROM2</i>   | 95'303'972                                    | 24                         |             |
| <i>CSEN</i>    | 95'326'799                                    | 9                          | 604662      |
| <i>TRIM43</i>  | 95'621'493                                    | 7                          |             |
| <i>FAHD2A</i>  | 95'432'203                                    | 8                          |             |
| <i>ARID5A</i>  | 96'566'195                                    | 6                          | 611583      |
| <i>LMAN2L</i>  | 96'735'396                                    | 8                          | 609552      |
| <i>SEMAC4C</i> | 96'889'201                                    | 15                         | 604462      |
| <i>COX5B</i>   | 97'628'953                                    | 4                          | 123866      |
| <i>ACTR1B</i>  | 97'638'863                                    | 11                         | 605144      |
| <i>STARD7</i>  | 96'214'324                                    | 8                          |             |
| <i>CNNM4</i>   | 96'790'366                                    | 7                          | 607805      |
| <i>CNNM3</i>   | 96'845'718                                    | 8                          | 607804      |

Table S2

**Primers and PCR conditions for human *CNNM4***

| Exon  | Forward primer (5'-3') | Reverse primer (5'-3') | Annealing T°   |
|-------|------------------------|------------------------|----------------|
| 1a    | CTGCTCCACCTTAAGCGACT   | TAGACAACCTCATCGGGTCC   | 60°C + betaine |
| 1b    | TAATTACGGTGCTGCTGGTG   | GAACGATTTTGGAGCGGTAG   | 60°C           |
| 2 + 3 | CCCCATCCTGGTGACTTATG   | CATAGGACGAGGGCTGCAG    | 60°C + betaine |
| 4     | CGGGAGTCGTCTGAGCAC     | CCCCTGTCCCTTGTTCCCT    | 58°C + betaine |
| 5     | GAGGTGCATGGCTTCCCT     | CGACACCAGAACTGAGCATG   | 60°C + betaine |
| 6     | CTTCCATGGGATGAGGTGAG   | AAACCCGAGATGCCTTTTTC   | 58°C           |
| 7     | TGTAAGGGCTTCCAGAGACG   | GGGTAGCTGTGATCAGGGAC   | 60°C + betaine |
| dupC  | CTATACTCGCATCCCGGTGT   | GAACGATTTTGGAGCGGTAG   | 60°C + betaine |
| R236Q | CAACATCTCCAGCAACCTGA   | CTTCTCTGCTCGTTGCTCCT   | 60°C + betaine |
| L324P | ACCTCAGGCCCTGTGCTC     | TATTGGACTGCTCGTCTTCG   | 60°C           |

**WAVE primers and conditions for human *CNNM4***

| Mutation | Temperature | %B buffer |
|----------|-------------|-----------|
| dupC     | 60°C        | 58%       |
| R236Q    | 62.9°C      | 60.5%     |
| L324P    | 60.4°C      | 59%       |



**Table S3****Primers for RT-PCR and real-time PCR of the mouse *Cnnm* genes**

| Gene         | Forward primer (5'-3') | Reverse primer (5'-3')           | Annealing T° |
|--------------|------------------------|----------------------------------|--------------|
| <i>Cnnm1</i> | GATCACACGACAACAGTACC   | TCAAGTTCTCAGCAGCTTC              | 58           |
| <i>Cnnm2</i> | TCTCTGCCTTTAAGCAGACG   | CCATCACACCATAGTAGGAG             | 58           |
| <i>Cnnm3</i> | ACATCGTGGACATGCTCTAC   | CCTCATTGTTACCTTCTGC              | 58           |
| <i>Cnnm4</i> | AGCAACCAGTTTGGCAGCTG   | GATCCTCGAGTCAGATGGTTTCCTCTTCGGAG | 58           |

**Primers for RT-PCR of mouse *Cnnm4* in mandibula and teeth**

| Gene         | Forward primer (5'-3') | Reverse primer (5'-3') | Annealing T° |
|--------------|------------------------|------------------------|--------------|
| <i>Cnnm4</i> | CTCTAGGAGGCACTCTTCTGC  | ATCCTCAGCCAGCCATGC     | 60           |
